1 **The predictors of new-onset atrial fibrillation incidence after on-pump**  
2 **coronary artery bypass graft surgery: A prospective study evaluating syntax**  
3 **score**

4 **Running title:** Incidence of new-onset atrial fibrillation after coronary artery bypass graft  
5 surgery could be predicted by syntax score.

6  
7 Authors: Hoda Mombeini <sup>1</sup>, Alireza Ebrahimi <sup>2</sup>, Saeed Yazdankhah <sup>3</sup>, Mohammad Ali Sheikhi <sup>4</sup>,  
8 Shahla Majidi <sup>3</sup>, Majid Pakdin <sup>2\*</sup>

- 9  
10 1- Dept. Cardiology, Sina Hospital, Tehran University of Medical Sciences, Tehran, Iran  
11 2- Student Research Committee, Faculty of Medicine, Shiraz University of Medical  
12 Sciences, Shiraz, Iran  
13 3- Dept. Cardiology, Nikan Hospital, Tehran, Iran  
14 4- Dept. Cardiovascular Surgery, Atherosclerosis Research Center, Jundishapur University  
15 of Medical Sciences, Ahvaz, Iran

16  
17 \* Corresponding author: Majid Pakdin, M.D

18 Address: Student Research Committee, Shiraz Medical School, Karimkhan Zand St, Shiraz, Iran

19 Email: [mp.pakdin@gmail.com](mailto:mp.pakdin@gmail.com)

20  
21  
22 ***Competing interest***

23 The authors confirm that there is no conflict of interest to declare.

24 ***Funding***

25 The authors received no financial support for the investigation and authorship.

26  
27  
28  
29

1 **Abstract**

2

3 **Background:** Atrial fibrillation (AF) is considered the most common supraventricular  
4 arrhythmia in patients undergoing coronary artery bypass graft (CABG). The predictive value of  
5 the SYNTAX score for post-CABG new-onset AF incidence has not been clearly evaluated. This  
6 study aimed to assess this association in patients undergoing isolated on-pump CABG.

7 **Method:** This study was done in a single-center, randomized, and observational setting. A total  
8 of 133 patients undergoing on-pump isolated CABG who were older than 18 years and had sinus  
9 rhythm were enrolled. Demographic variables of patients were recorded, and the SYNTAX score  
10 was measured for the participants. The multivariate logistic regression model was applied to  
11 identify the predictors of post-CABG new-onset AF.

12 **Results:** The logistic regression model showed that SYNTAX score of more than 28.25 (p-  
13 value= 0.001; OR= 14.25, 95% CI= 2.90\_70.11), hypertension (p-value=0.02; OR = 6.59, 95%  
14 CI = 1.23\_34.57), and calcium channel blocker consumption (p-value=0.02; OR = 8.05, 95% CI  
15 = 1.43\_45.42) are predictors of new-onset AF after on-pump CABG.

16 **Conclusion:** This study demonstrated that patients with higher SYNTAX scores in coronary  
17 angiography are more likely to develop new-onset AF after isolated on-pump CABG.

18

19 **Keywords:** Coronary Artery Bypass Grafting, SYNTAX Score, Postoperative Atrial Fibrillation

20

21

22

23

24

25

26

27

28

29

30

31

## 1           **1. Background**

2    Atrial fibrillation (AF) is the most common arrhythmia occurring after coronary artery bypass  
3    graft (CABG) surgery, with an incidence of approximately 27-33% [1-3]. Several risk factors  
4    were found to be related to postoperative AF occurrence, such as old age, diabetes mellitus,  
5    hypertension, chronic obstructive pulmonary disease, paroxysmal AF history, left ventricular  
6    dysfunction, cardiopulmonary bypass time, and cross-clamp time [2]. Patients are more  
7    vulnerable to developing AF arrhythmias within the first 4-5 postoperative days, particularly  
8    during the first 72 hours after the surgery [4]. Furthermore, post-CABG AF is accompanied by  
9    higher complications such as thromboembolism, renal failure, heart failure, mortality, and  
10   extended hospital stay, leading to lower quality of life for patients and increased treatment  
11   costs [5, 6]. The survival probability was found to be decreased in patients who had suffered  
12   from new-onset post-CABG AF [7].

13   The synergy between percutaneous coronary intervention with taxus and cardiac surgery  
14   (SYNTAX) score is based on angiographic imaging that assesses the complexity of coronary  
15   lesions and the severity of coronary artery disease (CAD) [8]. This scoring system was first  
16   introduced to compare two therapeutic methods of percutaneous coronary intervention with taxus  
17   stents versus CABG [6]. SYNTAX is also widely applied to predict the long-term consequences  
18   of CAD and decide on appropriate therapeutic interventions [8, 9]. Previous studies mentioned  
19   that patients undergoing CABG with higher SYNTAX scores are at greater mortality risk [10].

20   Although numerous investigations showed that SYNTAX score could be used as a predictive  
21   index for several post-CABG complications, such as myocardial infarction and stent thrombosis,  
22   little has been done regarding using this score as a predictor of new-onset post-CABG AF. The  
23   present study aimed to determine the association of the score with AF incidence after on-pump  
24   CABG.

## 25           **2. Methods**

### 26           **2.1. Study Design and Population**

27    A total of 133 patients undergoing on-pump isolated CABG surgery at the cardiac surgery ward  
28    in Golestan hospital, Ahvaz, Iran, were randomly enrolled in this observational study and were  
29    subsequently evaluated for post-CABG AF. Inclusion criteria were defined as individuals older  
30    than 18 years old with cardiac sinus rhythm who had CABG. The exclusion criteria included a  
31    history of thyroid disease, paroxysmal AF arrhythmia, previous cardiac surgery, percutaneous

1 coronary intervention (PCI) during the past six months, use of amiodarone or digoxin, moderate  
2 to severe mitral regurgitation, having implantable cardioverter defibrillator or permanent  
3 pacemaker, or left atrial size more than 4 cm.

4 Patients were observed by continuous electrocardiogram (EKG) monitoring during their stay in  
5 the intensive care unit (ICU). After detecting AF during constant monitoring, a 12-lead-EKG  
6 was taken to confirm arrhythmia. After being discharged from ICU, patients were also followed  
7 in the ward by radial pulse examination at least four times daily in terms of rate and regularity,  
8 which was done by expert staff. Should an irregular pulse be observed or patients become  
9 symptomatic, a 12-lead-ECG was taken to assess arrhythmia. In this study, AF was described as  
10 those that lasted for a minimum of 5 minutes. Ultimately, patients were classified into two  
11 groups: patients with AF arrhythmia and those without AF. The patients' SYNTAX scores  
12 compared with each other.

## 13 **2.2. SYNTAX Score Measurement**

14 To calculate the SYNTAX score, we scored each coronary lesion with >50% stenosis in vessels  
15 >1.5 mm diameter. Each lesion could involve more than one diseased segment. Other  
16 deterministic factors were coronary dominance, total occlusions, trifurcations, bifurcations,  
17 aorto-ostial lesions, severe tortuosity, severe calcifications, thrombus, and diffuse diseases.

18 All angiographic variables were calculated by an expert team consisting of a general cardiologist,  
19 an interventional cardiologist, and a cardiac surgeon based on the latest version of SYNTAX  
20 score. This version has been designed to improve long-term outcomes prediction following  
21 coronary revascularization by subsuming seven clinical variables, including age, peripheral  
22 vascular disease, chronic obstructive pulmonary disease, unprotected left main CAD, left  
23 ventricular ejection fraction, creatinine clearance, and sex, into the original SYNTAX score [11].

## 24 **2.3. Statistical Analysis**

25 The results were analyzed using Statistical Package for Social Sciences (SPSS), version 22. The  
26 relationship between post-CABG AF and different factors was analyzed using Chi-squared test,  
27 two-tailed *t*-test, Fisher's exact test, or Mann-Whitney U test as appropriate. Afterward, the  
28 multivariate logistic regression model was performed to identify the predictors of post-CABG  
29 AF. The predictive power of SYNTAX score for post-CABG AF was tested by receiver

1 operating characteristic (ROC) curve analysis. P value < 0.05 was considered statistically  
2 significant.

### 3 **2.4. Ethical Considerations**

4 The study protocol followed national and international guidelines. Informed consent was  
5 obtained from all participants, their anonymity was guaranteed, and the study protocol was  
6 approved by the Ethical Committee of Ahvaz Jundishapur University of Medical Sciences (Reg.  
7 No. IR.AJUMS.REC.1394.91).

### 8 **3. Results**

9 One hundred thirty-three patients with a mean age of  $59 \pm 8.5$  years participated in our study.  
10 Most participants were male, and the prevalence rates of diabetes mellitus, hypertension,  
11 dyslipidemia, and cigarette smoking were 51.1%, 75.2%, 69.2%, and 25.6%, respectively. The  
12 left ventricular ejection fraction (LVEF) ranged from 20% to 60% (Mean  $\pm$  SD:  $47.7 \pm 8.8\%$ ).  
13 The mean number of involved vessels was  $2.6 \pm 0.52$ , and the SYNTAX score ranged from 7 to  
14 55.5 (mean:  $28.66 \pm 9.95$ ). The left internal thoracic artery was used in 131 (98.5%) patients,  
15 while 23 (17.3%) and 80 (60.2%) patients received one and two saphenous vein grafts,  
16 respectively. Three and four saphenous vein grafts were used for 25 (18.8%) and 4 (3%),  
17 respectively. One remaining patient received no vein graft.

18 New-onset post-CABG AF incidence in our study was 21.8%. Preoperative variables and  
19 medications, as well as perioperative variables, are demonstrated in Tables 1, 2, and 3. During  
20 the investigation, there were three cases of mortality which all had developed AF arrhythmia  
21 during hospitalization. The cause of two deaths was postoperative acute renal failure. These two  
22 cases developed AF on days 2 and 3 of hospitalization. The mortality of the third case, who  
23 developed AF on day 7, was due to pneumonia and respiratory failure after prolonged admission  
24 in the ICU.

25 The ROC curve analysis showed good accuracy for the SYNTAX score in predicting post-  
26 CABG AF, with the area under the curve being 0.71 [95% CI: (0.69, 0.81)  $p < 0.001$ ]. The  
27 sensitivity and specificity were 89% and 56%, respectively, for SYNTAX scores greater than  
28 28.25 (Figure 1).

29 Multivariate analysis of the risk of new-onset AF incidence was also performed. Ten factors,  
30 including aspirin and calcium channel blockers, hypertension, left circumflex (LCX) artery

1 involvement, SYNTAX score, creatinine level, LVEF, platelet count, cardiopulmonary bypass  
2 time, and the number of anastomoses were considered in our analysis (Table 4).

3 The logistic regression model showed that SYNTAX score of more than 28.25 (p-value= 0.001;  
4 OR= 14.25, 95% CI= 2.90\_70.11), hypertension (p-value=0.02; OR = 6.59, 95% CI =  
5 1.23\_34.57), and calcium channel blocker consumption (p-value=0.018; OR = 8.05, 95% CI =  
6 1.43\_45.42) were the predictors of AF after on-pump CABG.

#### 7 **4. Discussion**

8 AF is considered the most common cardiac arrhythmia and accounts for mechanical heart  
9 dysfunction and subsequent complications [12]. The prevalence of AF in the general population  
10 has been measured to be 1-2% [12]. Among patients who had CABG, the incidence of AF is  
11 much higher, about 25-40% [13], and it has been reported that AF is the leading cause of post-  
12 CABG mortality [14]. A range of investigations has examined different prognostic AF indexes in  
13 patients undergoing CABG. Consistent with previous findings, our study showed a clinically  
14 significant correlation between post-CABG AF and hypertension, use of calcium channel  
15 blockers, and high SYNTAX score.

16 Different scoring systems, including HATCH score, EusoSCORE, and SYNTAX score, have  
17 been used to assess the relationship of the obtained score with post-CAB AF incidence in  
18 previous studies [12, 13, 15-17]. In the current study, the latter has been used for this purpose.  
19 Priorly, SYNTAX score was classified as a reliable predictor of major cardiovascular event rate  
20 after revascularization [18-20].

21 Although the association of SYNTAX score and new-onset post-CABG AF has not been  
22 evaluated extensively, few studies have shown the relationship between higher SYNTAX score  
23 and new-onset post-CABG AF incidence in patients who underwent on-pump CABG [12, 13,  
24 21]. The present study showed that a higher SYNTAX score could be used as a prognostic factor  
25 of new-onset post-CABG AF incidence in patients who underwent on-pump CABG. The cutoff  
26 level of SYNTAX score to predict post-CABG AF was 28.25 in our study, which is higher than  
27 the determined cutoff level in previous studies [12, 13, 21]. Contrarily, Fukui *et al.* reported that  
28 both high SYNTAX score and high Euroscore II were independent predictors of early major  
29 complications after CABG; however, according to their investigation, new-onset post-CABG AF  
30 was not increased in the group with both high SYNTAX score and high Euroscore II than other  
31 groups [22]. Compared to our study, they used a combination of Euroscore II and SYNTAX  
Mombeini, H. et al.

1 score, and their study was not designed exclusively to evaluate the correlation between  
2 SYNTAX score and new-onset post-CABG AF; as a result, the patients with preoperative AF  
3 arrhythmia had not been excluded from the study. Furthermore, the majority of patients in their  
4 study had undergone off-pump CABG, and as previously documented, those cases undergoing  
5 off-pump CABG are at lower risk of developing AF [23].

6 Several studies have identified hypertension as a risk factor for post-CABG AF [24, 25].  
7 Consistent with the current body of evidence, our data suggest hypertension as an independent  
8 risk factor for post-CABG AF (OR = 6.5). This association may be due to hypertension-related  
9 structural changes. A number of changes in the hypertrophied heart, such as fibrosis, may act as  
10 a substrate for reentry arrhythmias [26, 27]. Subsequently, AF could be maintained by these  
11 focal reentry firings [28].

12 According to previous studies, non-dihydropyridine calcium channel blockers (CCBs) could  
13 significantly reduce the incidence of post-cardiac surgery supraventricular arrhythmias [29].  
14 Additionally, prophylactic diltiazem could reduce new-onset post-CABG AF [30]. In contrast to  
15 these findings, a comprehensive evaluation of different pharmacotherapies for the prevention of  
16 post-CABG AF reported that CCB therapy could not decrease the odds of new-onset post-CABG  
17 AF [31]. In our study, CCB consumers were found to have higher rates of postoperative AF than  
18 non-consumers. The following aspects could explain this finding: (1) In our analysis, all patients  
19 were on dihydropyridine treatment, not nondihydropyridines. (2) With the paucity of information  
20 on postoperative adherence to medications, it may be possible that this result is due to low  
21 postoperative continuation of calcium channel blockers and hypertension crisis following  
22 calcium channel blocker withdrawal, as the majority of our patients used them for hypertension.

23 There were several limitations in the present study. First, our study population could not be  
24 considered representative of all post-CABG patients owing to the fact that our cases were  
25 obtained only from one center and are subject to sampling bias. Second, we stated each patient's  
26 cardiac rhythm status based on the preoperative ECG findings relying on the medical charts to  
27 determine whether any prior episodes of AF arrhythmia had been noted. As a result, we might  
28 have missed potential asymptomatic paroxysmal AF arrhythmia in individuals who showed  
29 normal sinus rhythm on the preoperative ECG. Finally, continuous Holter ECG monitoring was  
30 not continued after ICU discharge; however, radial pulses and symptoms were assessed in the

1 ward at least four times daily, so there is little likelihood of sustained episodes of AF being  
2 missed.

### 3 **5. Conclusion**

4 The results of this study reveal that SYNTAX score  $\geq 28.25$ , hypertension, and use of calcium  
5 channel blockers are predictors of post-CABG AF. Therefore, it seems sensible to calculate  
6 preoperative SYNTAX scores and consider using anti-arrhythmic agents for those with high  
7 SYNTAX scores, which may ultimately decrease post-CABG AF occurrence.

### 8 **6. Acknowledgement**

9 The authors appreciate the nurses and physicians at the cardiac surgery ward of Golestan  
10 Hospital, Ahvaz, who helped to conduct this study.

### 11 **7. References**

- 12 1. Mathew JP, Parks R, Savino JS, Friedman AS, Koch C, Mangano DT, et al. Atrial  
13 fibrillation following coronary artery bypass graft surgery: predictors, outcomes, and resource  
14 utilization. *Jama*. 1996;276(4):300-6.
- 15 2. Peretto G, Durante A, Limite LR, Cianflone D. Postoperative arrhythmias after cardiac  
16 surgery: incidence, risk factors, and therapeutic management. *Cardiology research and practice*.  
17 2014;2014.
- 18 3. Mathew JP, Fontes ML, Tudor IC, Ramsay J, Duke P, Mazer CD, et al. A multicenter  
19 risk index for atrial fibrillation after cardiac surgery. *Jama*. 2004;291(14):1720-9.
- 20 4. Podrid PJ. Prevention of postoperative atrial fibrillation: what is the best approach. *J Am*  
21 *Coll Cardiol*. 1999;34(2):340-2.
- 22 5. Creswell LL, Damiano Jr RJ. Postoperative atrial fibrillation: an old problem crying for  
23 new solutions. *The Journal of thoracic and cardiovascular surgery*. 2001;121(4):638-41.
- 24 6. Gungor H, Eryilmaz U, Akgullu C, Zencir C, Kurtoglu T, Selvi M, et al. Preoperative  
25 poor coronary collateral circulation can predict the development of atrial fibrillation after  
26 coronary artery bypass graft surgery. *Coronary artery disease*. 2013;24(7):572-6.
- 27 7. Villareal RP, Hariharan R, Liu BC, Kar B, Lee V-V, Elayda M, et al. Postoperative atrial  
28 fibrillation and mortality after coronary artery bypass surgery. *Journal of the American College*  
29 *of Cardiology*. 2004;43(5):742-8.
- 30 8. Bundhun PK, Sookharee Y, Bholee A, Huang F. Application of the SYNTAX score in  
31 interventional cardiology: a systematic review and meta-analysis. *Medicine*. 2017;96(28).



- 1 9. Farooq V, Head SJ, Kappetein AP, Serruys PW. Widening clinical applications of the  
2 SYNTAX Score. *Heart*. 2014;100(4):276-87.
- 3 10. Yang H, Zhang L, Xu CH. Use of the SYNTAX Score II to predict mortality in  
4 interventional cardiology: A systematic review and meta-analysis. *Medicine*. 2019;98(2).
- 5 11. Farooq V, Van Klaveren D, Steyerberg EW, Meliga E, Vergouwe Y, Chieffo A, et al.  
6 Anatomical and clinical characteristics to guide decision making between coronary artery bypass  
7 surgery and percutaneous coronary intervention for individual patients: development and  
8 validation of SYNTAX score II. *The Lancet*. 2013;381(9867):639-50.
- 9 12. Engin M, Aydın C. Investigation of the effect of HATCH score and coronary artery  
10 disease complexity on atrial fibrillation after on-pump coronary artery bypass graft surgery.  
11 *Medical Principles and Practice*. 2021;30(1):45-51.
- 12 13. Geçmen Ç, Babür Güler G, Erdoğan E, Hatipoğlu S, Güler E, Yılmaz F, et al. SYNTAX  
13 score predicts postoperative atrial fibrillation in patients undergoing on-pump isolated coronary  
14 artery bypass grafting surgery. *The Anatolian Journal of Cardiology*. 2016.
- 15 14. El-Chami MF, Kilgo P, Thourani V, Lattouf OM, Delurgio DB, Guyton RA, et al. New-  
16 onset atrial fibrillation predicts long-term mortality after coronary artery bypass graft. *Journal of*  
17 *the American College of Cardiology*. 2010;55(13):1370-6.
- 18 15. Bundhun PK, Sookharee Y, Bholee A, Huang F. Application of the SYNTAX score in  
19 interventional cardiology: A systematic review and meta-analysis. *Medicine (Baltimore)*.  
20 2017;96(28):e7410.
- 21 16. Emren V, Aldemir M, Duygu H, Kocabaş U, Tecer E, Cerit L, et al. Usefulness of  
22 HATCH score as a predictor of atrial fibrillation after coronary artery bypass graft. *Kardiologia*  
23 *Polska (Polish Heart Journal)*. 2016;74(8):749-53.
- 24 17. Selvi M, Gungor H, Zencir C, Gulasti S, Eryilmaz U, Akgullu C, et al. A new predictor  
25 of atrial fibrillation after coronary artery bypass graft surgery: HATCH score. *Journal of*  
26 *Investigative Medicine*. 2018;66(3):648-52.
- 27 18. Sianos G, Morel M-A, Kappetein AP, Morice M-C, Colombo A, Dawkins K, et al. The  
28 SYNTAX Score: an angiographic tool grading the complexity of coronary artery disease.  
29 *EuroIntervention*. 2005;1(2):219-27.
- 30 19. Valgimigli M, Serruys PW, Tsuchida K, Vaina S, Morel M-A, van den Brand MJ, et al.  
31 Cyphering the complexity of coronary artery disease using the syntax score to predict clinical  
Mombeini, H. et al.

- 1 outcome in patients with three-vessel lumen obstruction undergoing percutaneous coronary  
2 intervention. *The American journal of cardiology*. 2007;99(8):1072-81.
- 3 20. Serruys PW, Morice M-C, Kappetein AP, Colombo A, Holmes DR, Mack MJ, et al.  
4 Percutaneous coronary intervention versus coronary-artery bypass grafting for severe coronary  
5 artery disease. *New England journal of medicine*. 2009;360(10):961-72.
- 6 21. Cerit L, Duygu H, Gulsen K, Kemal HS, Ozcem B, Balcioglu O, et al. Is SYNTAX score  
7 predictive of atrial fibrillation after on-pump coronary artery bypass graft surgery? *Korean*  
8 *circulation journal*. 2016;46(6):798-803.
- 9 22. Fukui T, Uchimuro T, Takanashi S. EuroSCORE II with SYNTAX score to assess risks  
10 of coronary artery bypass grafting outcomes. *European Journal of Cardio-Thoracic Surgery*.  
11 2015;47(1):66-71.
- 12 23. Møller CH, Penninga L, Wetterslev J, Steinbrüchel DA, Gluud C. Off-pump versus  
13 on-pump coronary artery bypass grafting for ischaemic heart disease. *Cochrane Database of*  
14 *Systematic Reviews*. 2012(3).
- 15 24. Aranki SF, Shaw DP, Adams DH, Rizzo RJ, Couper GS, VanderVliet M, et al. Predictors  
16 of atrial fibrillation after coronary artery surgery. Current trends and impact on hospital  
17 resources. *Circulation*. 1996;94(3):390-7.
- 18 25. Sobczyk D, Sadowski J, Sniezek-Maciejewska M. [Causes of atrial fibrillation early after  
19 coronary artery bypass grafting]. *Przegl Lek*. 2005;62(3):141-7.
- 20 26. McLenachan JM, Dargie HJ. Ventricular arrhythmias in hypertensive left ventricular  
21 hypertrophy. Relationship to coronary artery disease, left ventricular dysfunction, and  
22 myocardial fibrosis. *Am J Hypertens*. 1990;3(10):735-40.
- 23 27. Toyoshima H, Park YD, Ishikawa Y, Nagata S, Hirata Y, Sakakibara H, et al. Effect of  
24 ventricular hypertrophy on conduction velocity of activation front in the ventricular myocardium.  
25 *Am J Cardiol*. 1982;49(8):1938-45.
- 26 28. Iwasaki Y-k, Nishida K, Kato T, Nattel S. Atrial fibrillation pathophysiology:  
27 implications for management. *Circulation*. 2011;124(20):2264-74.
- 28 29. Wijeyesundera DN, Beattie WS, Rao V, Karski J. Calcium antagonists reduce  
29 cardiovascular complications after cardiac surgery: a meta-analysis. *Journal of the American*  
30 *College of Cardiology*. 2003;41(9):1496-505.

1 30. Dobrilovic N, Vadlamani L, Buchert B, Wright C. Diltiazem prophylaxis reduces  
 2 incidence of atrial fibrillation after coronary artery bypass grafting. *Journal of Cardiovascular*  
 3 *Surgery*. 2005;46(5):457.

4 31. Piccini JP, Zhao Y, Steinberg BA, He X, Mathew JP, Fullerton DA, et al. Comparative  
 5 effectiveness of pharmacotherapies for prevention of atrial fibrillation following coronary artery  
 6 bypass surgery. *The American Journal of Cardiology*. 2013;112(7):954-60

## 7 8. Tables

8

**Table 1.** Pre-operative variables and laboratory data.

|                                         | Group Non-AF                                           | Group AF                                              | P- value           |
|-----------------------------------------|--------------------------------------------------------|-------------------------------------------------------|--------------------|
|                                         | <b>N(%)<br/>or Mean <math>\pm</math>SD<br/>(n=104)</b> | <b>N(%)<br/>or Mean <math>\pm</math>SD<br/>(n=29)</b> |                    |
| <b>Age</b>                              | 58.7 $\pm$ 8.5                                         | 60.6 $\pm$ 8.7                                        | 0.48 <sup>1</sup>  |
| <b>Gender (% male)</b>                  | 70 (67.3%)                                             | 19 (65.5%)                                            | 0.86 <sup>2</sup>  |
| <b>Diabetes Mellitus</b>                | 52 (50.0%)                                             | 16 (55.2%)                                            | 0.62 <sup>2</sup>  |
| <b>Hypertension</b>                     | 73 (70.2%)                                             | 27 (93.1%)                                            | 0.01 <sup>2</sup>  |
| <b>Dyslipidemia</b>                     | 71 (68.3%)                                             | 21 (72.4%)                                            | 0.67 <sup>2</sup>  |
| <b>Body mass index</b>                  | 26.7 $\pm$ 3.4                                         | 28 $\pm$ 5.3                                          | 0.24 <sup>1</sup>  |
| <b>Cigarette Smoking</b>                | 29 (27.9%)                                             | 5 (17.2%)                                             | 0.25 <sup>2</sup>  |
| <b>Stroke history</b>                   | 10 (9.6%)                                              | 4 (13.8%)                                             | 0.51 <sup>2</sup>  |
| <b>Myocardial infarction history</b>    | 36 (34.6%)                                             | 12 (41.4%)                                            | 0.51 <sup>2</sup>  |
| <b>Left main disease</b>                | 12 (11.5%)                                             | 2 (6.9%)                                              | 0.73 <sup>2</sup>  |
| <b>Left anterior descending disease</b> | 104 (100%)                                             | 29 (100%)                                             | >0.99 <sup>2</sup> |
| <b>Left circumflex disease</b>          | 85 (81.7%)                                             | 27 (93.1%)                                            | 0.16 <sup>2</sup>  |
| <b>Ramus intermedius artery</b>         | 4 (3.8%)                                               | 1 (3.4%)                                              | 0.92 <sup>2</sup>  |
| <b>Right coronary artery disease</b>    | 87 (83.7%)                                             | 25 (86.2%)                                            | 0.74 <sup>2</sup>  |
| <b>Number of involved vessels</b>       |                                                        |                                                       |                    |
| <b>One</b>                              | 4 (3.8%)                                               | 0 (0.0%)                                              | 0.53 <sup>1</sup>  |
| <b>Two</b>                              | 28 (26.9%)                                             | 6 (20.7%)                                             |                    |

|                                           |               |                |                    |
|-------------------------------------------|---------------|----------------|--------------------|
| <b>Three</b>                              | 72 (69.2%)    | 23 (79.3%)     |                    |
| <b>Left ventricular ejection fraction</b> | 48.12± 6.76   | 45.17± 9.11    | 0.08 <sup>1</sup>  |
| <b>SYNTAX Score</b>                       | 27.25± 10.27  | 33.76± 6.66    | 0.012 <sup>1</sup> |
| <b>Creatinine</b>                         | 1.01± 0.24    | 1.21± 0.61     | 0.12 <sup>1</sup>  |
| <b>Glomerular filtration rate</b>         | 82.93± 24.93  | 76.44± 29.43   | 0.24 <sup>1</sup>  |
| <b>Hemoglobin</b>                         | 12.3± 1.53    | 12.3± 1.60     | 0.94 <sup>1</sup>  |
| <b>Platelet</b>                           | 262.38± 77.35 | 299.00± 114.35 | 0.12 <sup>1</sup>  |

<sup>1</sup> Two-tailed T-test

<sup>2</sup>  $\chi^2$

1

**Table 2.** Preoperative medications.

|                                            | Group non-AF    | Group AF       | P- value <sup>1</sup> |
|--------------------------------------------|-----------------|----------------|-----------------------|
|                                            | N(%)<br>(n=104) | N(%)<br>(n=29) |                       |
| <b>Beta-blocker</b>                        | 90 (86.5%)      | 23 (79.3%)     | 0.34                  |
| <b>Aspirin</b>                             | 96 (92.3%)      | 24 (82.8%)     | 0.13                  |
| <b>Statin</b>                              | 87 (83.7%)      | 24 (82.8%)     | 0.91                  |
| <b>Renin-angiotensin system inhibitors</b> | 57 (54.8%)      | 17 (58.6%)     | 0.72                  |
| <b>Calcium channel blocker</b>             | 8 (7.7%)        | 5 (17.2%)      | 0.13                  |

<sup>1</sup>  $\chi^2$

2

**Table 3.** Peri-operative variables.

|                                             | Group non-AF                    | Group AF                       | P- value            |
|---------------------------------------------|---------------------------------|--------------------------------|---------------------|
|                                             | N (%)<br>or mean ±SD<br>(n=104) | N (%)<br>or mean ±SD<br>(n=29) |                     |
| <b>Cardio-pulmonary bypass time</b>         | 74.5±21.93                      | 84.00±32.60                    | 0.14 <sup>1</sup>   |
| <b>Aortic cross-clamp time</b>              | 42.80±11.80                     | 43.83±10.15                    | 0.51 <sup>1</sup>   |
| <b>Use of left internal thoracic artery</b> | 102 (98.1%)                     | 29 (100%)                      | > 0.99 <sup>2</sup> |
| <b>Number of anastomoses</b>                | 2.97±0.74                       | 3.31±0.54                      | 0.008 <sup>1</sup>  |

<sup>1</sup> Two-tailed t-test

$\chi^2$

1  
2  
3

**Table 4.** Multivariate analysis of the risk of new-onset AF incidence.

|                                           | P-value <sup>1</sup> | Odds ratio | 95% CI        |
|-------------------------------------------|----------------------|------------|---------------|
| <b>Aspirin</b>                            | 0.210                | 0.336      | 0.62- 1.835   |
| <b>Calcium channel blocker</b>            | 0.018                | 8.045      | 1.425- 45.416 |
| <b>Hypertension</b>                       | 0.026                | 6.587      | 1.225- 34.568 |
| <b>Left circumflex artery disease</b>     | 0.677                | 1.472      | 0.238- 9.106  |
| <b>Syntax score (&gt; 28.25)</b>          | 0.001                | 14.253     | 2.898- 70.111 |
| <b>Creatinine</b>                         | 0.136                | 4.689      | 0.615- 35.737 |
| <b>Left ventricular ejection fraction</b> | 0.165                | 0.956      | 0.897- 1.019  |
| <b>Platelet</b>                           | 0.066                | 1.005      | 1.000- 1.011  |
| <b>Cardiopulmonary bypass time</b>        | 0.330                | 0.988      | 0.963- 1.013  |
| <b>Number of anastomoses</b>              | 0.090                | 2.471      | 0.869- 7.027  |

<sup>1</sup> Fischer's exact test

4  
5  
6  
7  
8  
9

## 9. Figures

**Figure 1.** Sensitivity and specificity of SYNTAX Score at Post CABG atrial fibrillation diagnosis.

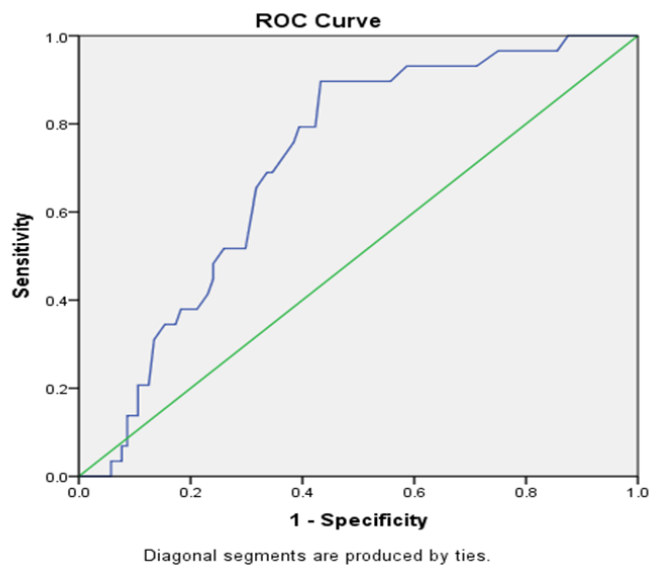

1
